# Supplementary material for: Effect of counterions on the micellization and monolayer behaviour of cationic gemini surfactants
Source: Royal Society of Chemistry journal article supplement (doi:10.1039/c7cp00775b), 2017-01-01

**Chemical shifts ( $\delta$ ) and  $^1\text{H}$ NMR peak splitting of 16-2-16 series of gemini surfactants with various counterions:**

**16-2-16·2X ( $\text{X}^- = \text{Br}^-$  or  $\text{Cl}^-$ ).  $^1\text{H}$ NMR (300 MHz,  $\text{CDCl}_3$ , 25 °C,  $\delta$  ppm):**

7.24 (1H, s); 4.75 (4H, s); 3.69 (4H, s); 3.49 (12H, s); 1.78 (4H, s); 1.35 (4H, s); 1.23 (48H, s); 0.85 (6H, t).

**16-2-16·2AMP.  $^1\text{H}$ NMR (300 MHz,  $\text{D}_2\text{O}$ , 25 °C,  $\delta$  ppm):**

8.36 (2H, s); 8.07 (2H, s); 5.98 (2H, s); 4.57 (1H, s); 4.38 (2H, t); 4.22 (2H, s); 4.03 (4H, s); 3.81 (4H, s); 3.35 (4H, s); 3.17 (12H, s); 1.61 (4H, s); 1.19 (4H, s); 1.05 (48H, s); 0.67 (6H, t).

**16-2-16·2UMP.  $^1\text{H}$ NMR (300 MHz,  $\text{D}_2\text{O}$ , 25 °C,  $\delta$  ppm):**

7.92 (2H, d); 5.91 (1H, m); 4.67 (1H, s); 4.29 (4H, s); 4.17 (2H, s); 4.05 (3H, s); 3.87 (4H, s); 3.46 (4H, s); 3.23 (12H, s); 1.75 (4H, s); 1.34 (4H, s); 1.19 (48H, s); 0.79 (6H, t).

**16-2-16·2CMP.  $^1\text{H}$ NMR (300 MHz,  $\text{D}_2\text{O}$ , 25 °C,  $\delta$  ppm):**

7.99 (2H, d); 6.08 (2H, d); 5.90 (2H, s); 4.67 (4H, s); 4.25 (1H, s); 4.09 (2H, m); 4.02 (4H, s); 3.39 (4H, s); 3.21 (12H, s); 1.70 (4H, s); 1.32 (4H, s); 1.22 (48 H, s); 0.82 (6H, t).

**16-2-16·2GMP.  $^1\text{H}$ NMR (300 MHz,  $\text{D}_2\text{O}$ , 25 °C,  $\delta$  ppm):**

7.99 (2H, d); 5.79 (2H, m); 4.64 (2H, s); 4.38 (2H, m); 4.16 (1H, m); 3.98 (4H, s); 3.81 (4H, d); 3.36 (4H, s); 3.15 (12H, s); 1.63 (4H, s); 1.14 (4H, s); 1.11 (48H, s); 0.72 (6H, t).

**16-2-16·Tartrate.  $^1\text{H}$ NMR (300 MHz,  $\text{D}_2\text{O}$ , 25 °C,  $\delta$  ppm):**

4.20 (4H, s); 3.84 (2H, s); 3.39 (4H, s); 3.18 (12H, s); 3.18 (2H, s); 1.68 (4H, s); 1.28 (4H, s); 1.23 (48H, s); 0.81 (6H, t).

**16-2-16·Malate.  $^1\text{H}$ NMR (300 MHz,  $\text{D}_2\text{O}$ , 25 °C,  $\delta$  ppm):**

4.11 (1H, m); 3.81 (4H, s); 3.35 (4H, s); 3.14 (12H, s); 2.50 (1H, d); 2.26 (2H, m); 1.65 (4H, s); 1.27 (4H, s); 1.19 (48H, s); 0.77 (6H, t).

**<sup>1</sup>HNMR Spectra of 16-2-16 series of gemini surfactants with various counterions:**

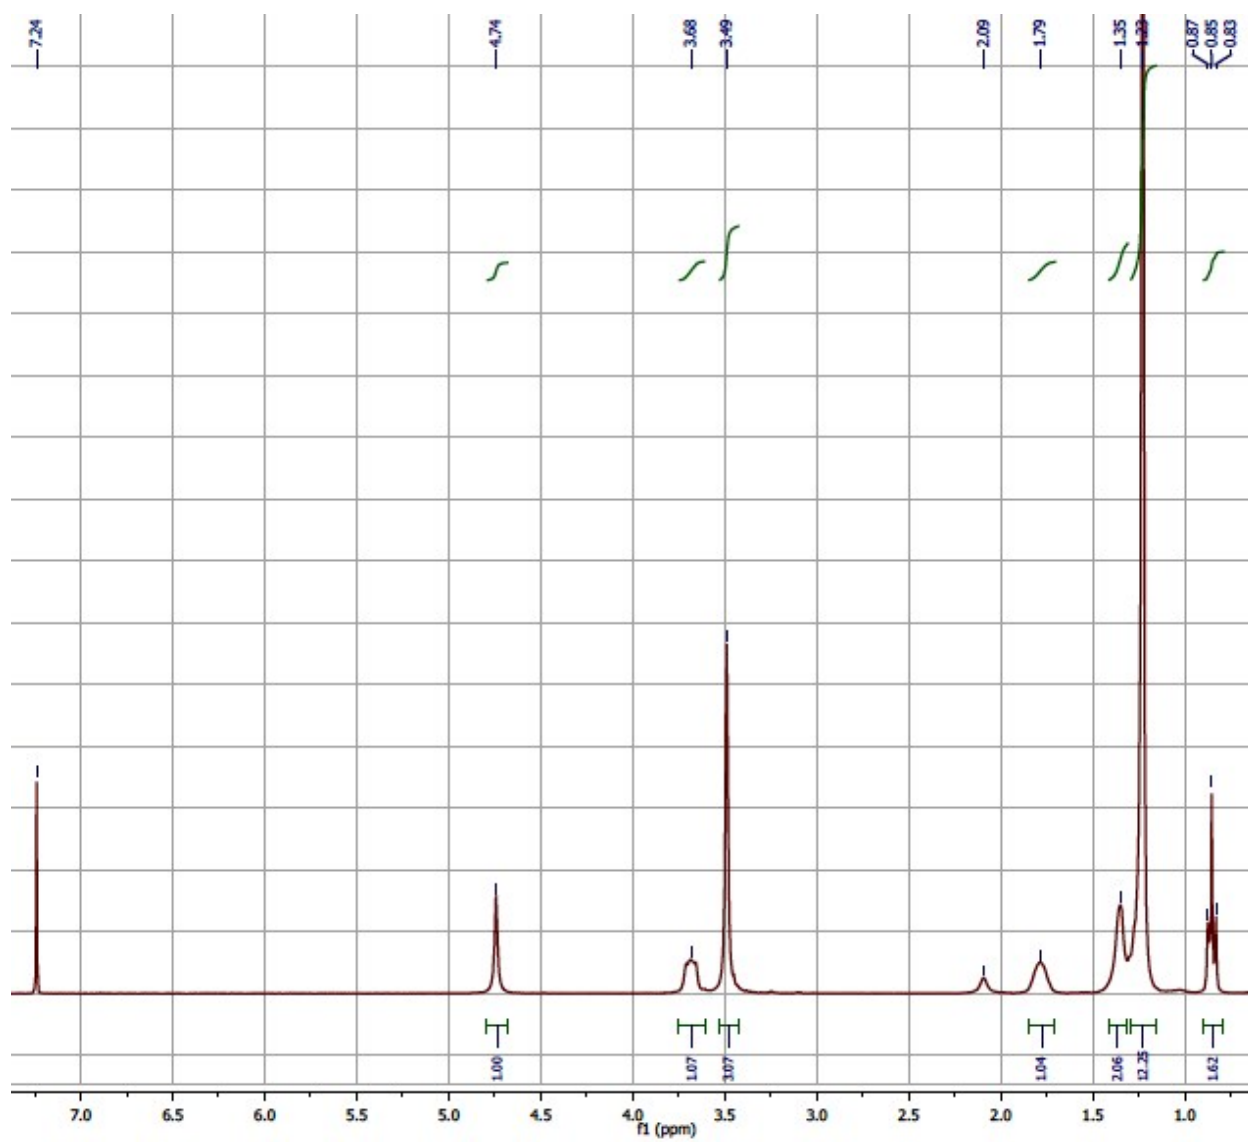

**Figure S-1: <sup>1</sup>HNMR spectra of 16-2-16·2Br**

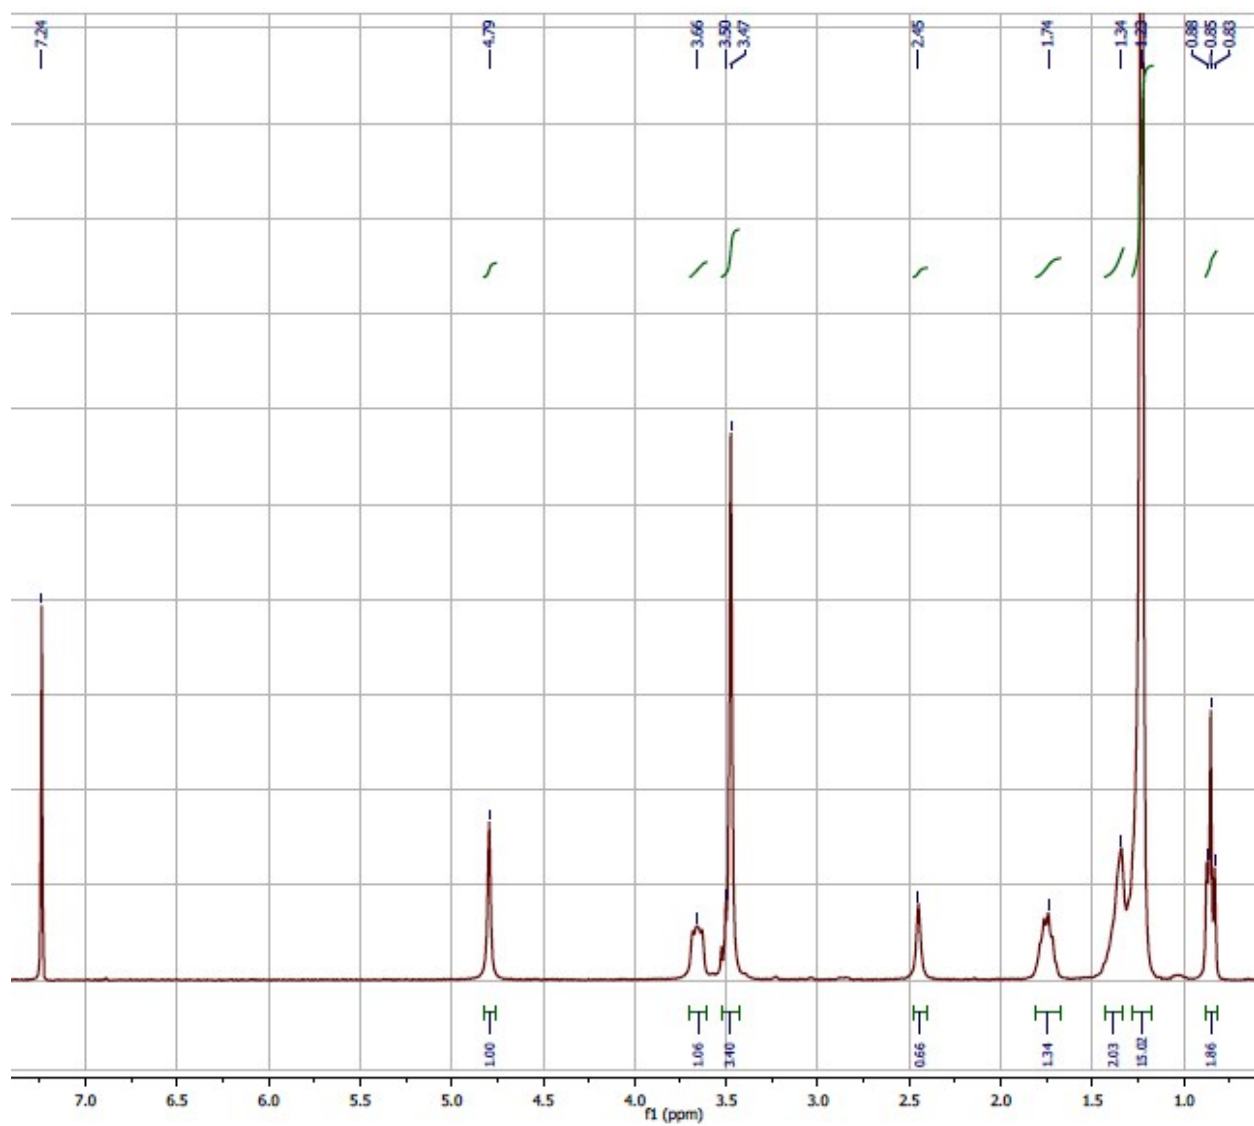

Figure S-2: <sup>1</sup>H NMR spectra of 16-2-16·2Cl

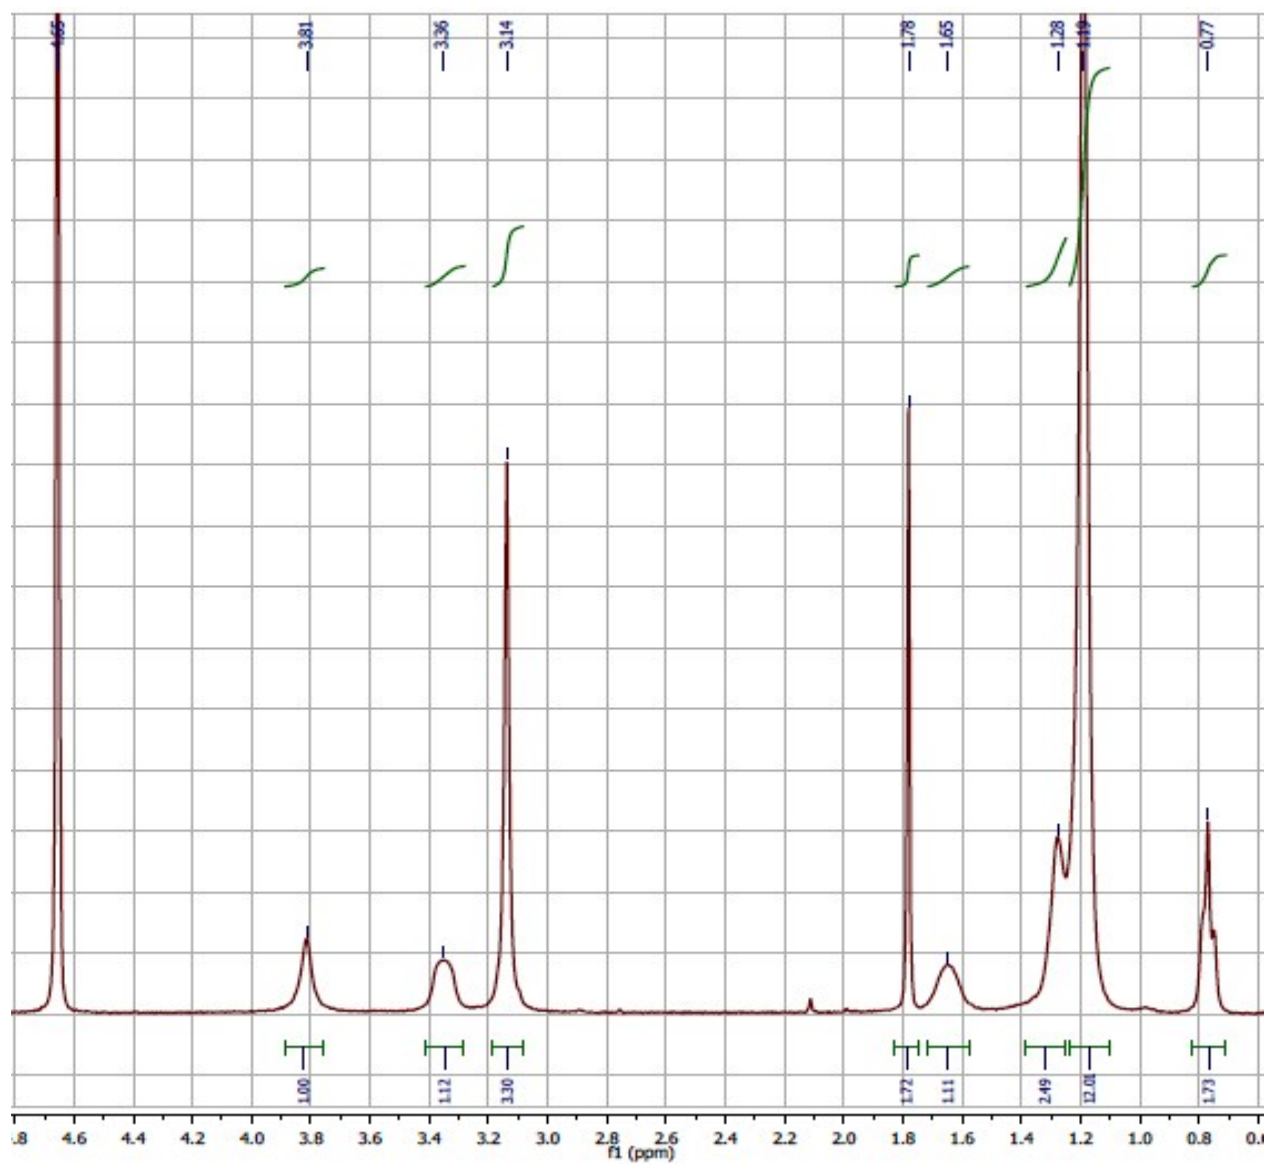

Figure S-3:  $^1\text{H}$ NMR spectra of 16-2-16-2Ac

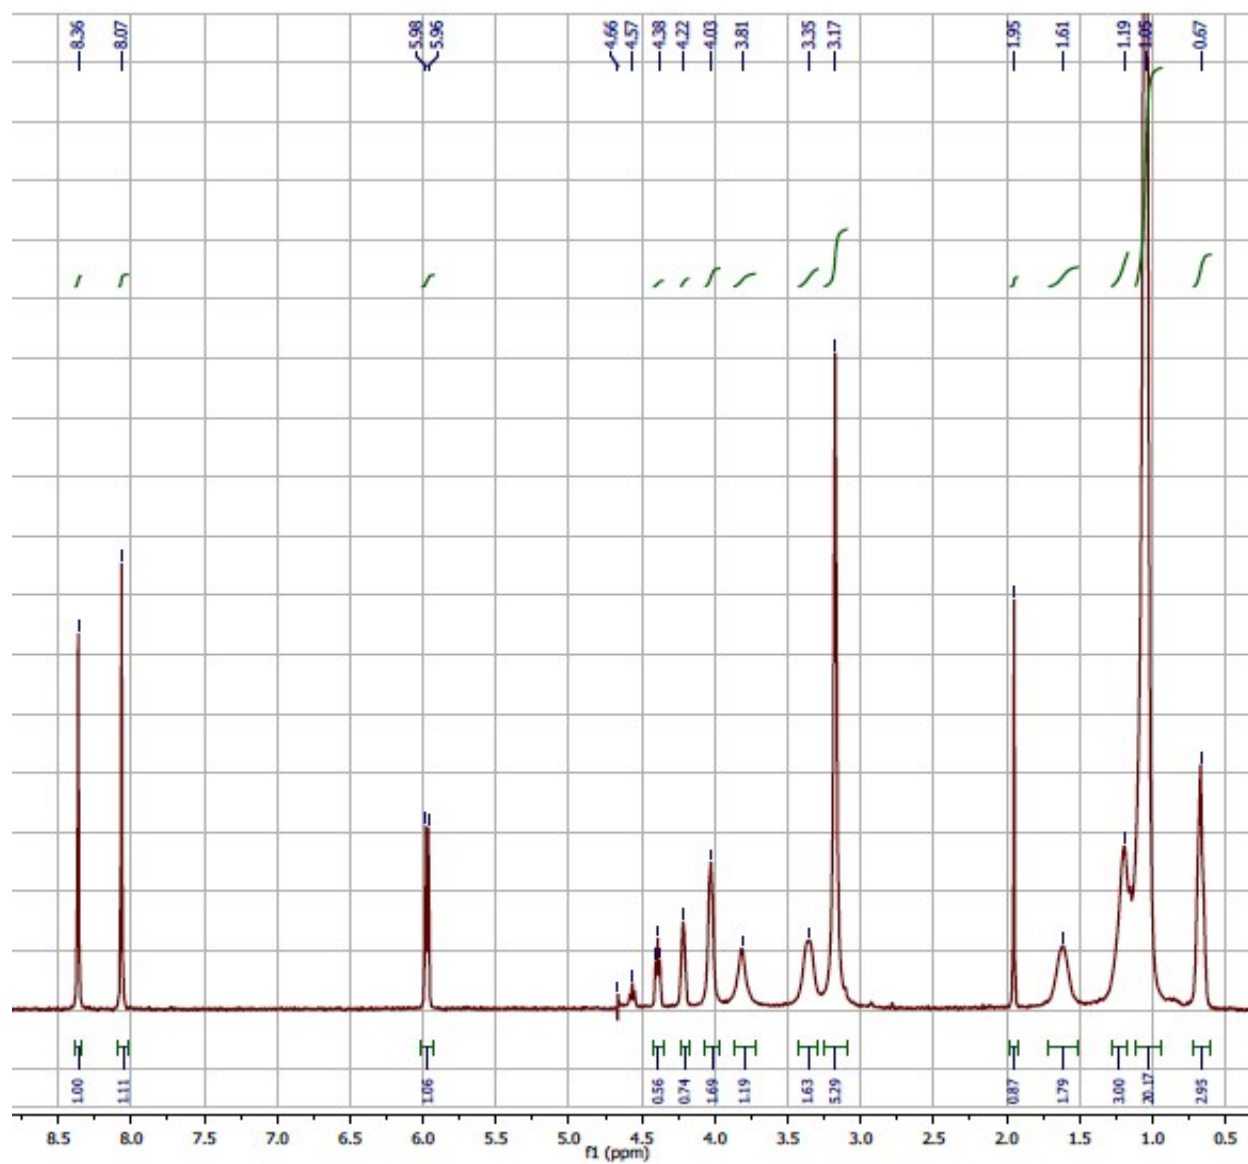

Figure S-4:  $^1\text{H}$ NMR spectra of 16-2-16-2AMP

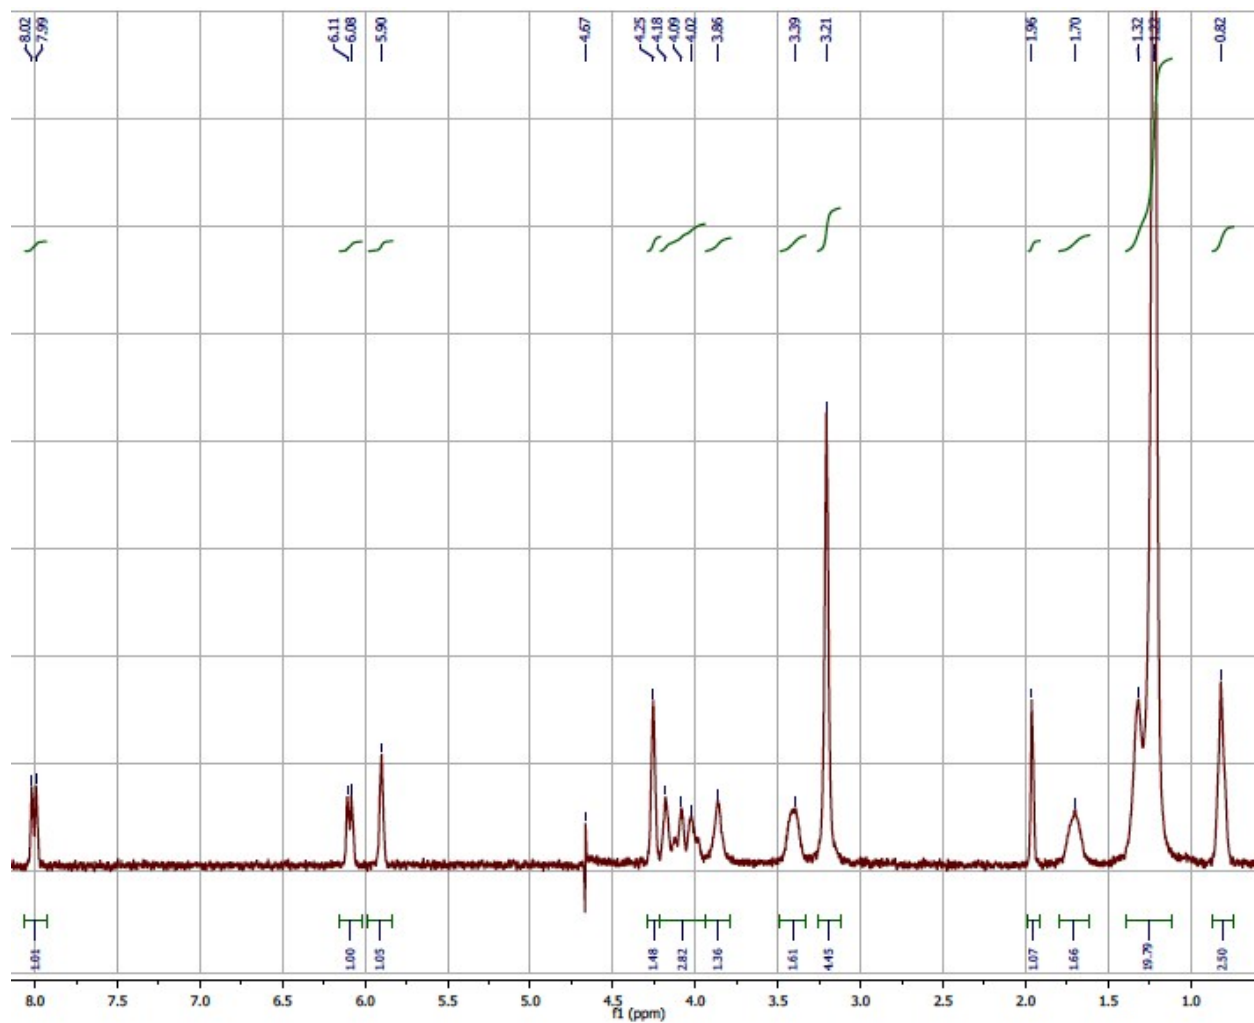

Figure S-5:  $^1\text{H}$ NMR spectra of 16-2-16·2CMP

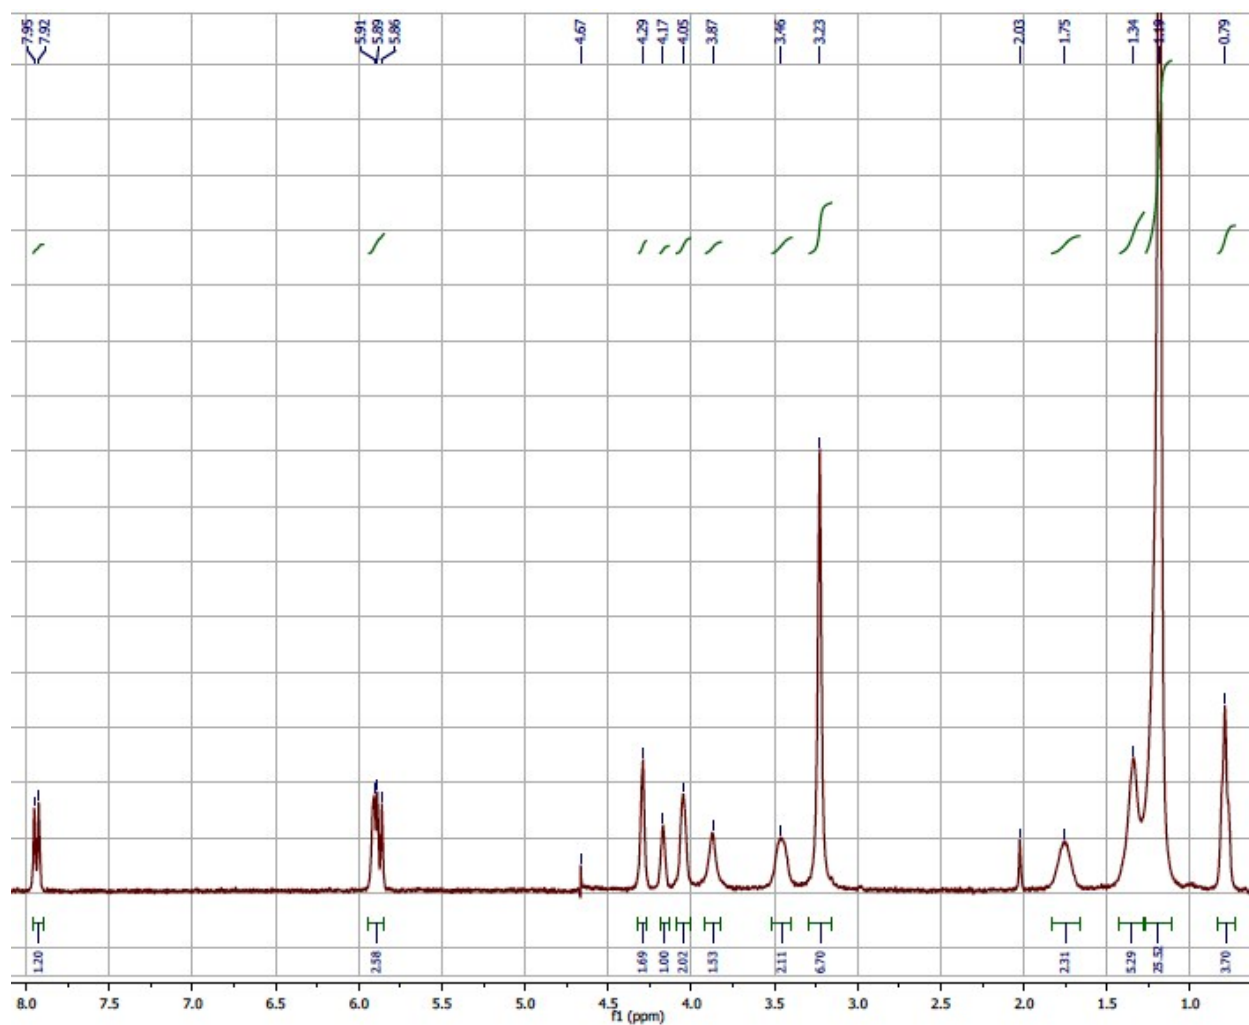

Figure S-6:  $^1\text{H}$ NMR spectra of 16-2-16-2UMP

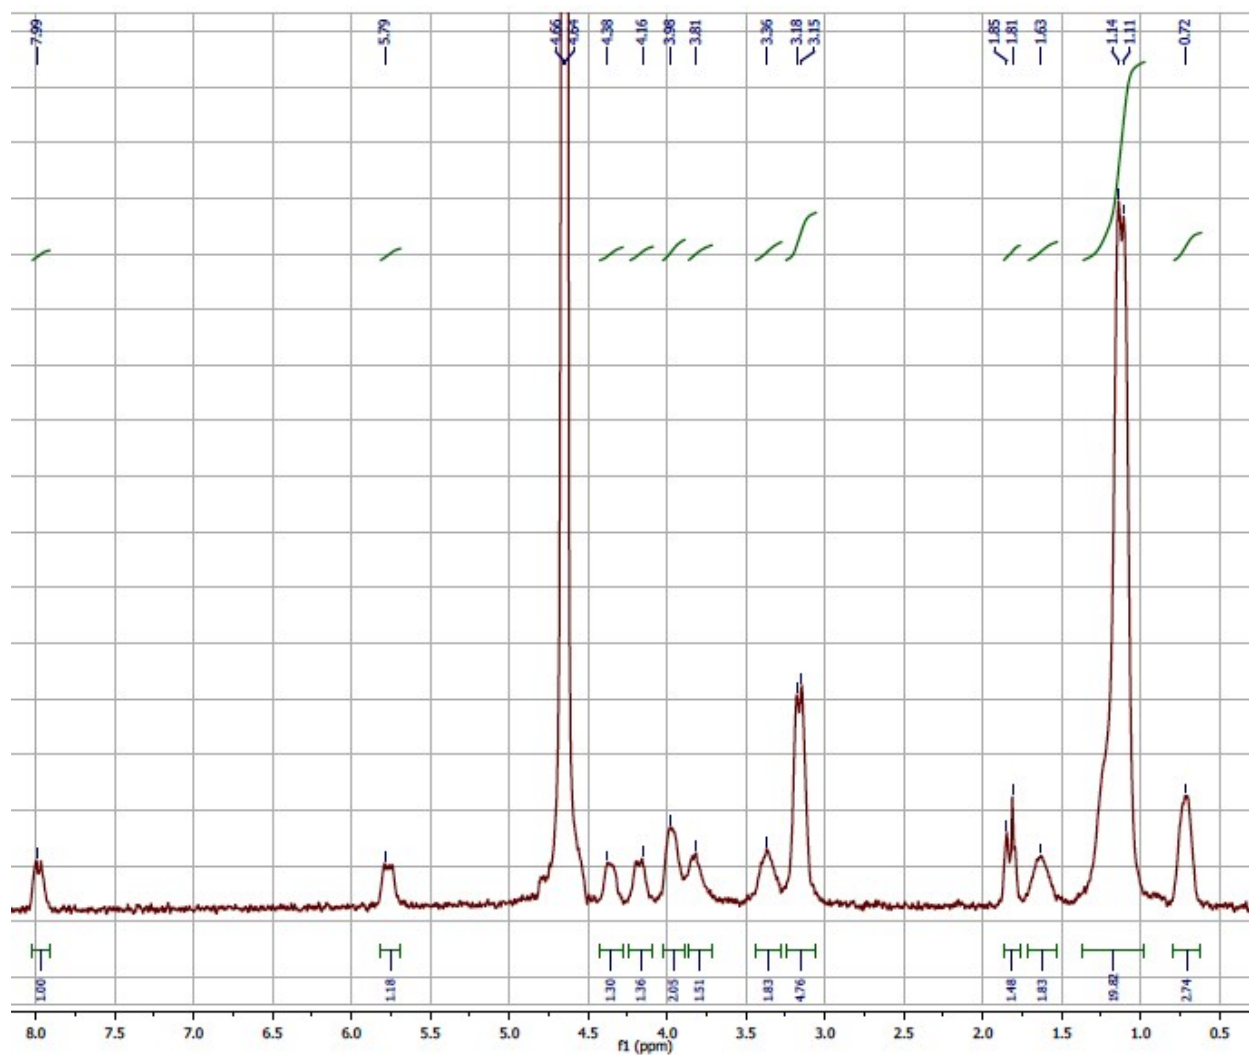

Figure S-7:  $^1\text{H}$ NMR spectra of 16-2-16-2GMP



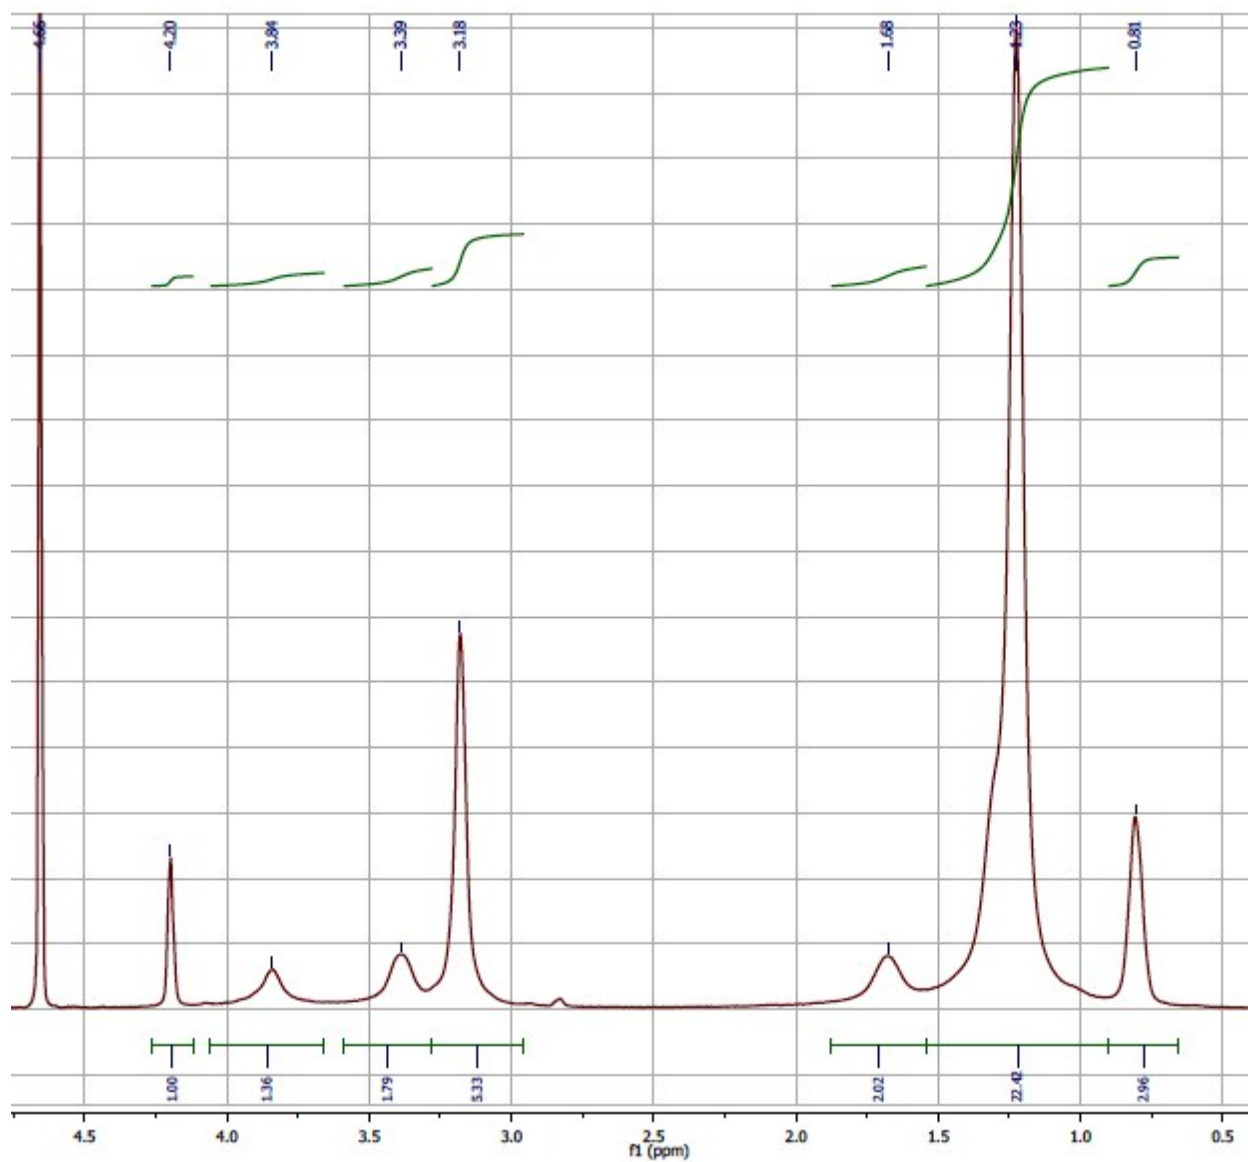

Figure S-8: <sup>1</sup>H NMR spectra of 16-2-16 Tartrate

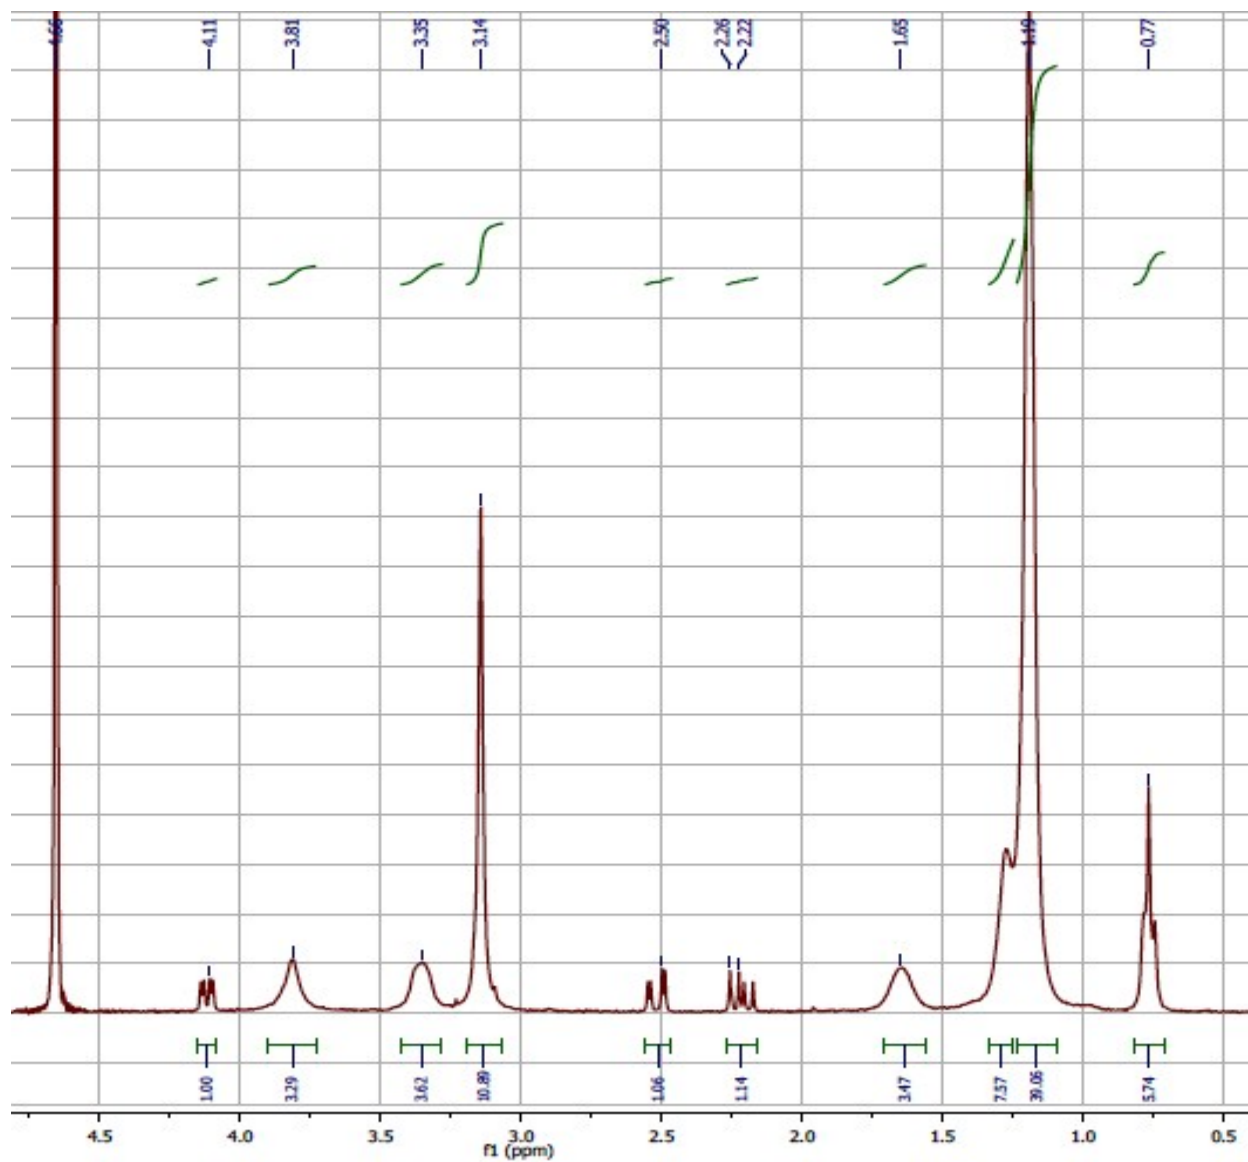

**Figure S-9:** <sup>1</sup>H NMR spectra of 16-2-16-Malate

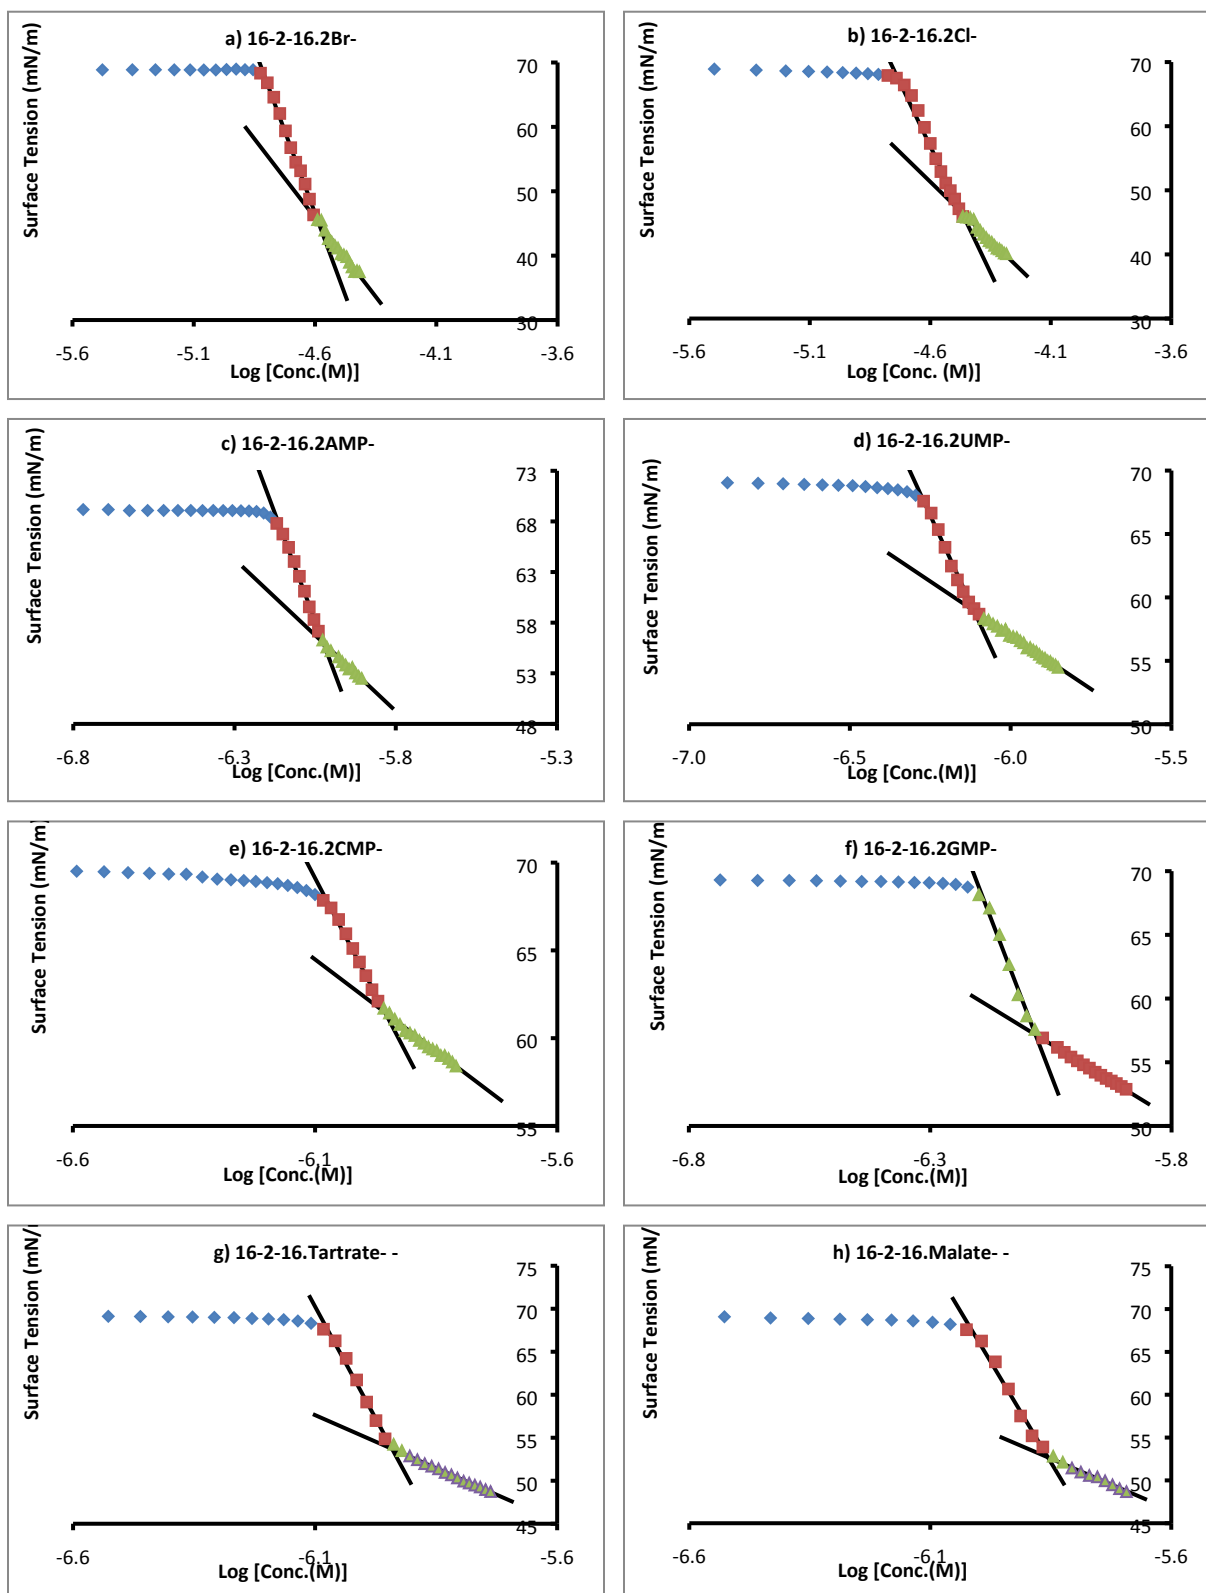

**Figure S-10:** Surface tension vs Log (Conc.) plots of 16-2-16 series of GSs

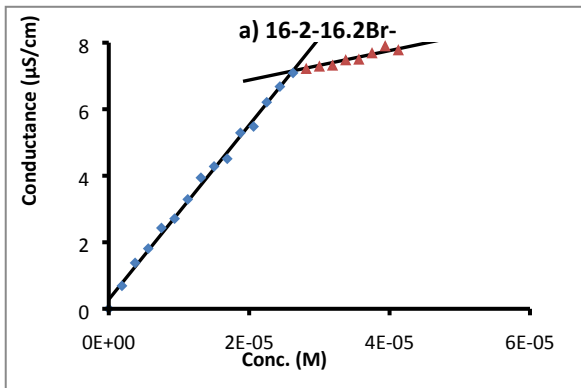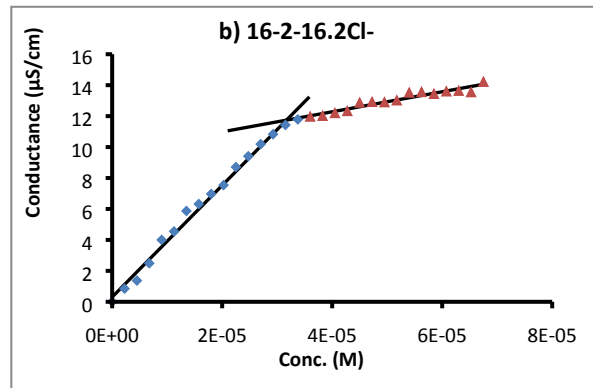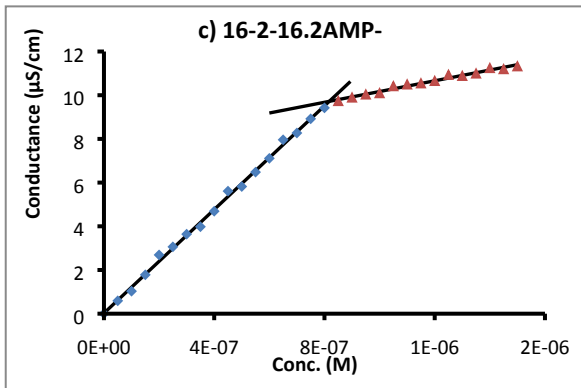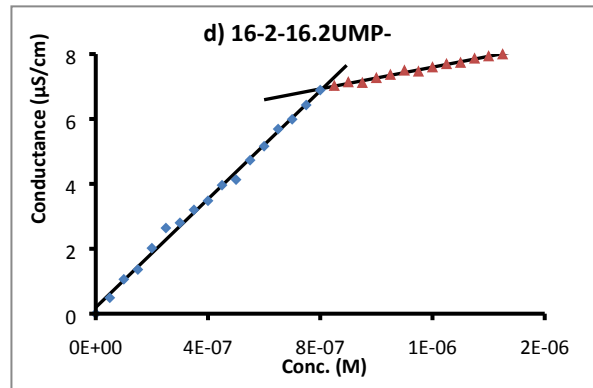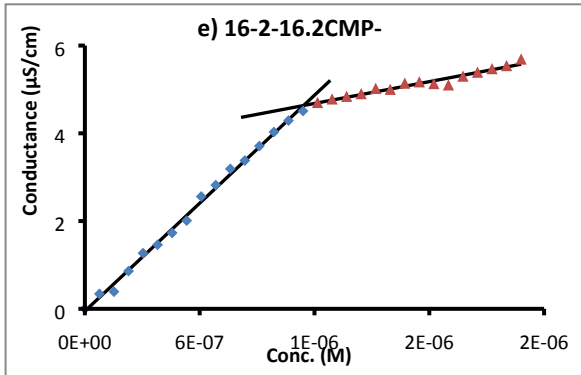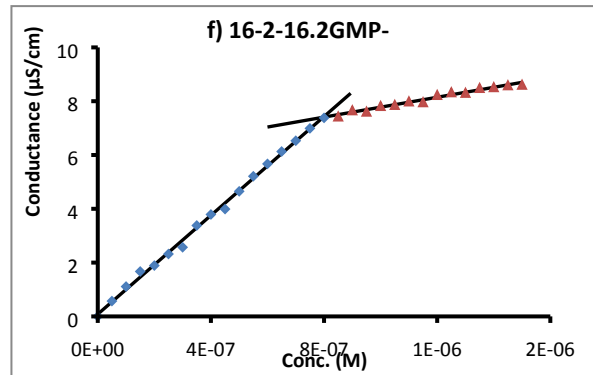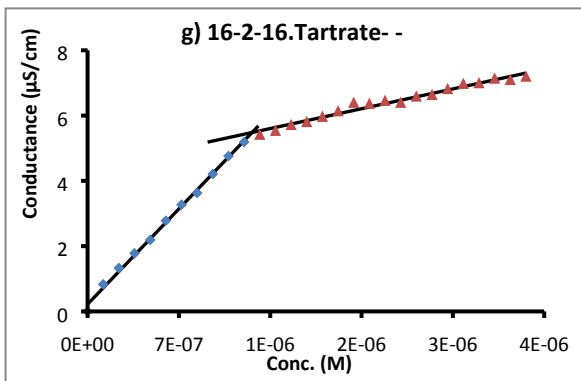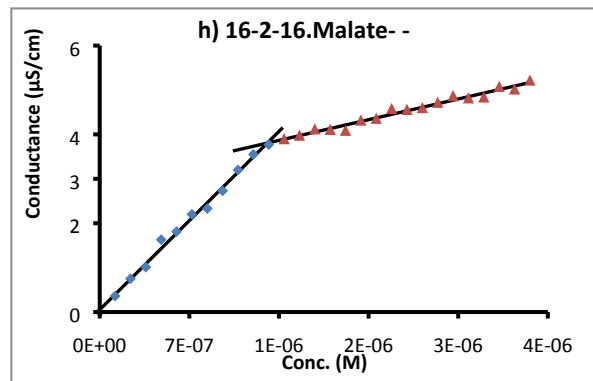

Supplement: c7cp00775b1.pdf [file c7cp00775b1.pdf]
